# Supplementary material
Source: HighWire-hosted journal article supplement (https://jnm.snmjournals.org/highwire/filestream/94843/field_highwire_adjunct_files/0/163782_Supplemental_Data.pdf)
Supplement: 163782_Supplemental_Data.pdf [file 163782_Supplemental_Data.pdf]

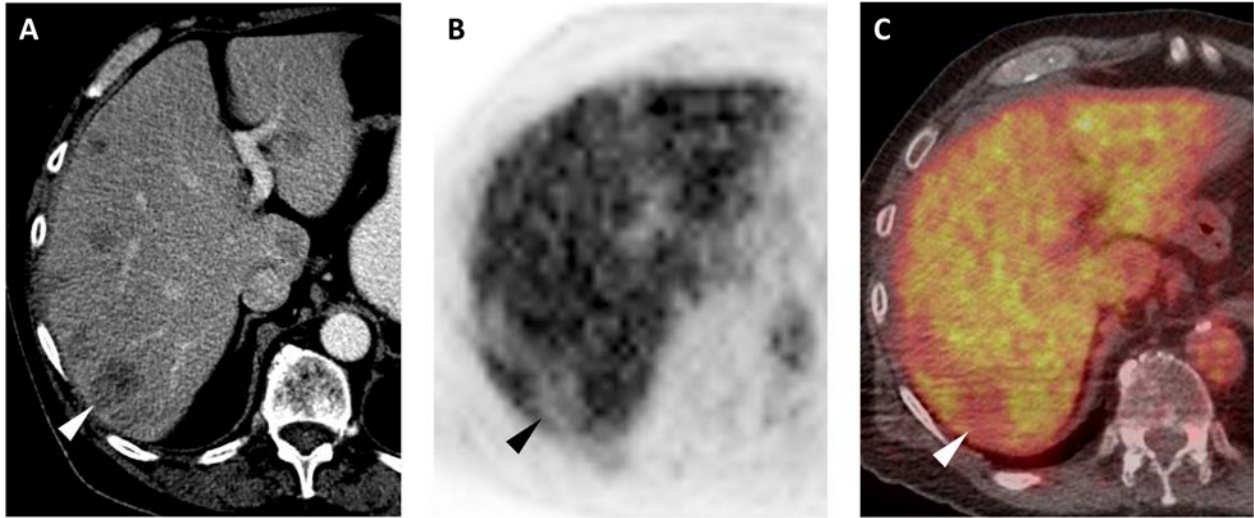

**Supplemental Figure 1.** Axial CECT (A), axial DCFBC PET (B), and axial DCFBC PET/CT (C) images in a patient with biopsy proven diffuse metastatic prostate cancer to the liver. Some of the larger, more focal masses in the liver could be seen as areas of relative photopenia with DCFBC PET (black and white arrowheads in (A) – (C)).

**Supplemental Table 1.**

|          |         |        | All patients |                    |              |                  | HNPC patients |                    |              |                  | CRPC patients |                    |              |                  |
|----------|---------|--------|--------------|--------------------|--------------|------------------|---------------|--------------------|--------------|------------------|---------------|--------------------|--------------|------------------|
| Modality |         |        | All lesions  | Lymph node lesions | Bone lesions | Visceral lesions | All lesions   | Lymph node lesions | Bone lesions | Visceral lesions | All lesions   | Lymph node lesions | Bone lesions | Visceral lesions |
| PET      | CT      | BS     |              |                    |              |                  |               |                    |              |                  |               |                    |              |                  |
| Pos      | Neg/Eq  | _      | 148          | 44                 | 100          | 4                | 44            | 23                 | 19           | 2                | 104           | 21                 | 81           | 2                |
| Pos      | _       | Neg/Eq | 170          | N/A                | 64           | N/A              | 76            | N/A                | 13           | N/A              | 94            | N/A                | 51           | N/A              |
| Pos      | Neg/Eq* |        | 170          | 97                 | 64           | 9                | 76            | 60                 | 13           | 3                | 94            | 37                 | 51           | 6                |
| Neg/Eq   | Pos     | _      | 50           | 2                  | 47           | 1                | 5             | 2                  | 3            | 0                | 45            | 0                  | 44           | 1                |
| Neg/Eq   | _       | Pos    | 14           | N/A                | 14           | N/A              | 3             | N/A                | 3            | N/A              | 11            | N/A                | 11           | N/A              |
| Neg/Eq   | Pos*    |        | 55           | 2                  | 52           | 1                | 6             | 2                  | 4            | 0                | 49            | 0                  | 48           | 1                |

**Supplemental Table 1.** The total number of lesions detected per modality, lesion type, and patient type.
